# Supplementary material for: Absence of adaptive evolution is the main barrier against influenza emergence in horses in Asia despite frequent virus interspecies transmission from wild birds
Source: PubMed Central journal article supplement (PMC6366691; doi:10.1371/journal.ppat.1007531), 2019-02-07
Supplement: ppat.1007531.s001.pdf [file ppat.1007531.s001.pdf]

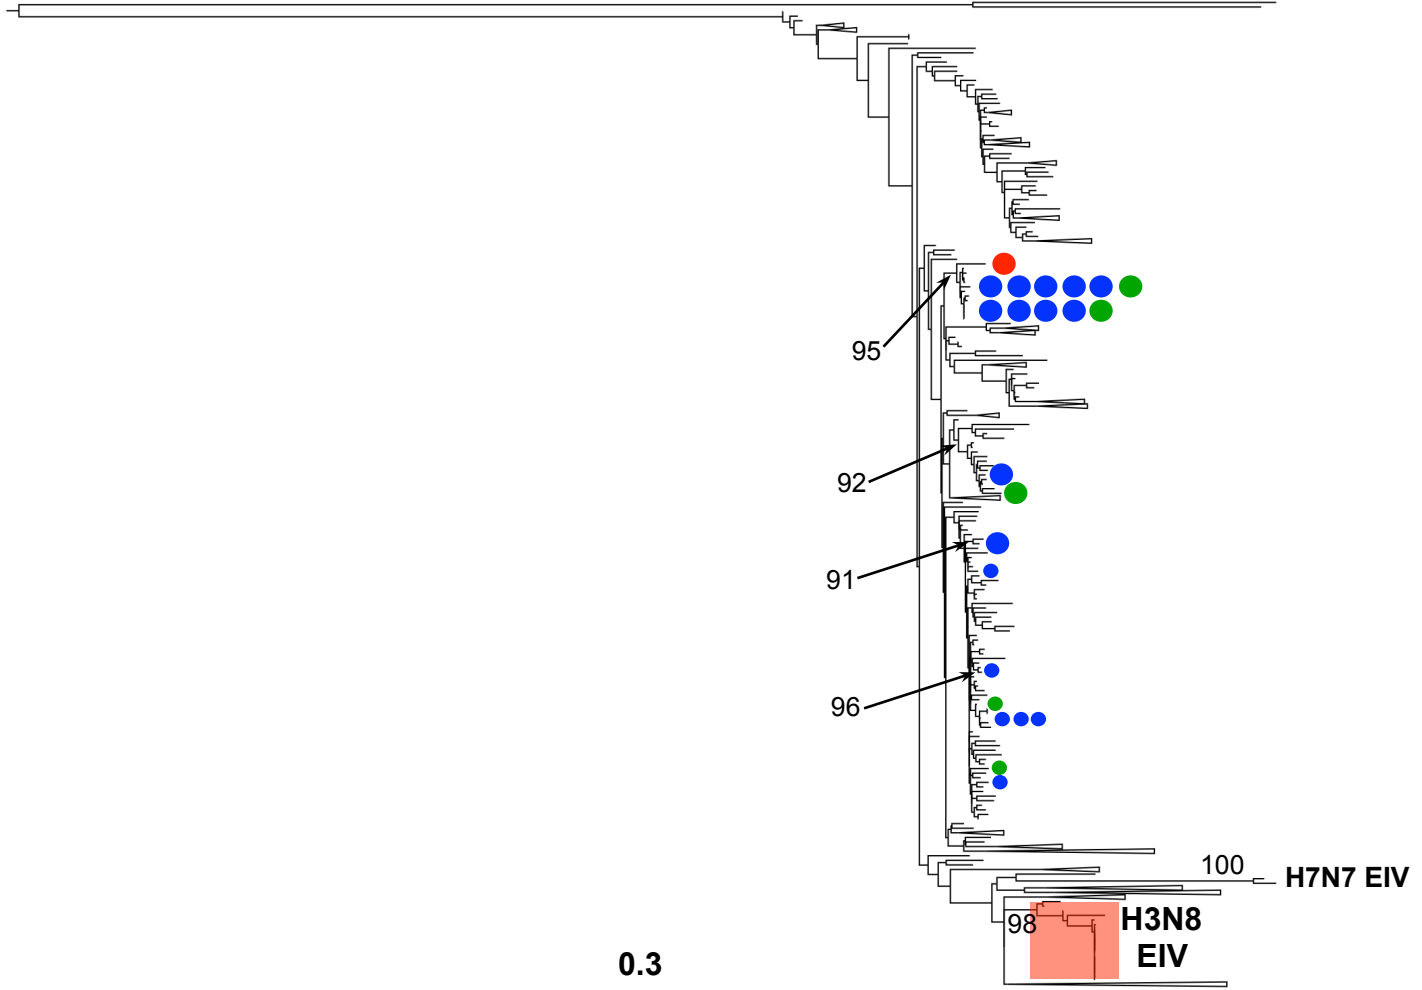

- EIV/Jilin/89
- AIVs collected in Mongolia
- AIVs collected in Mongolia used in serology

S1 Figure
