# Supplementary material for: Absence of adaptive evolution is the main barrier against influenza emergence in horses in Asia despite frequent virus interspecies transmission from wild birds
Source: PubMed Central journal article supplement (PMC6366691; doi:10.1371/journal.ppat.1007531), 2019-02-07

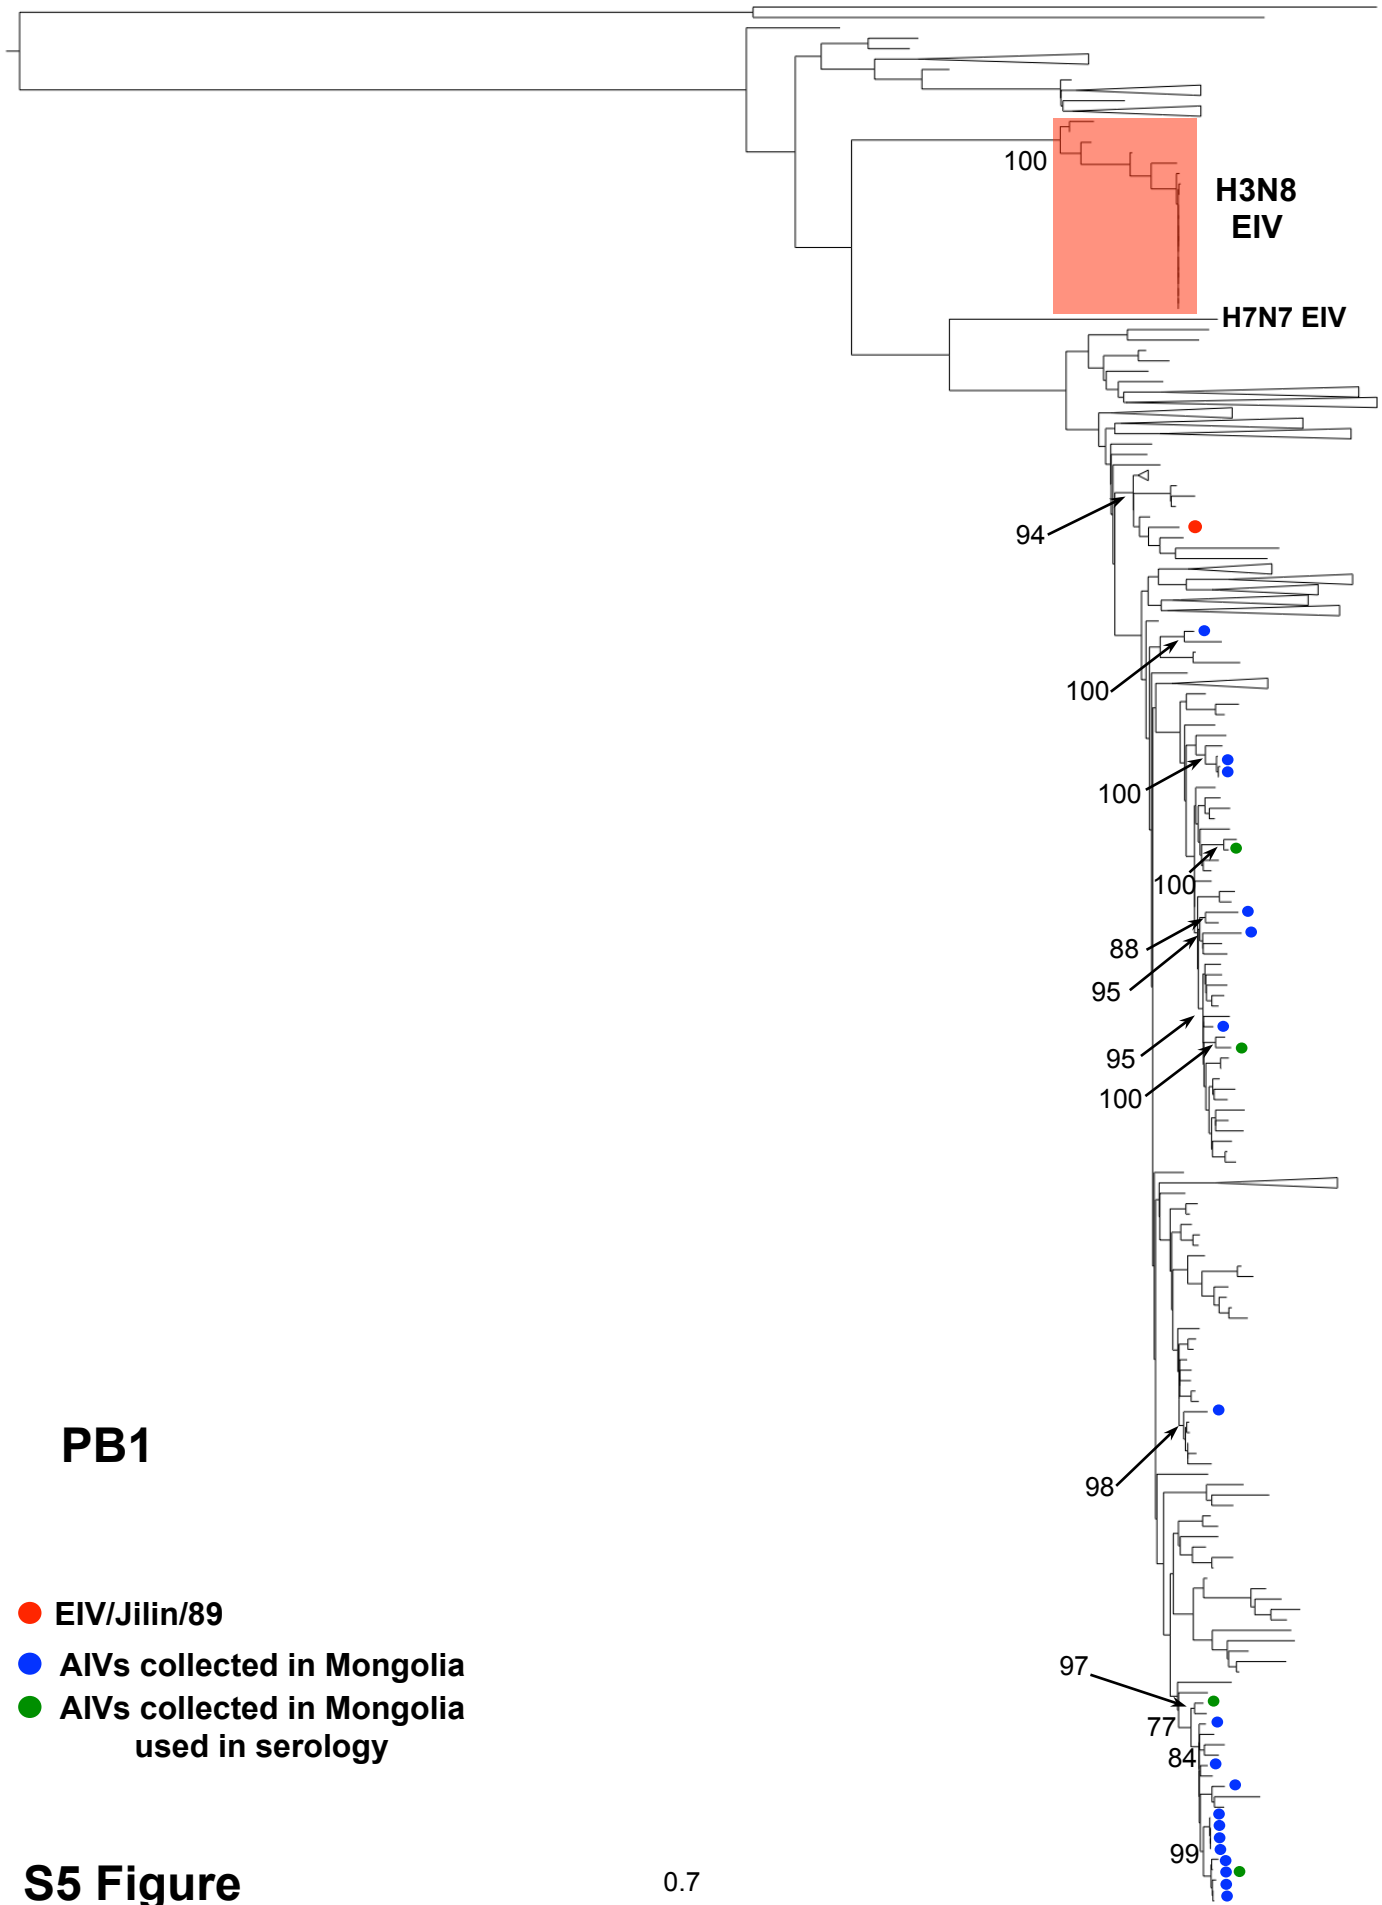

Supplement: ppat.1007531.s005.pdf [file ppat.1007531.s005.pdf]
