# Supplementary material for: Absence of adaptive evolution is the main barrier against influenza emergence in horses in Asia despite frequent virus interspecies transmission from wild birds
Source: PubMed Central journal article supplement (PMC6366691; doi:10.1371/journal.ppat.1007531), 2019-02-07
Supplement: ppat.1007531.s007.pdf [file ppat.1007531.s007.pdf]

**S1 Appendix.** Comparison between hemagglutination inhibition and microneutralization assays.

Horse serum samples that were positive by hemagglutination inhibition (HI) to the avian influenza viruses under study (AIV/881, AIV/963, AIV/2076, AIV/2106, and AIV/2271) were further tested in microneutralization (MN) assays following standard protocols available in the *Manual for the laboratory diagnosis and virological surveillance of influenza* (WHO Global Influenza Surveillance Network, 2011). As some serum samples were cytotoxic, a lower number of sera was tested in MN assays for all viruses except AIV/963. The table below shows that HI and MN results shared  $\geq 83.3\%$  consistency. On average, 91.7% of serum samples positive to AIVs by HI were also positive in MN assays.

| <b>Virus</b>    | <b>HI<sup>a</sup></b> | <b>MN<sup>b</sup></b> | <b>Agreement (%)</b> |
|-----------------|-----------------------|-----------------------|----------------------|
| <b>AIV/881</b>  | 33(38)                | 32                    | 97                   |
| <b>AIV/963</b>  | 74(74)                | 69                    | 93.2                 |
| <b>AIV/2076</b> | 34(36)                | 31                    | 91.2                 |
| <b>AIV/2106</b> | 34(36)                | 32                    | 94.1                 |
| <b>AIV/2271</b> | 36(44)                | 30                    | 83.3                 |

<sup>a</sup> Number of positive serum samples tested using the HI assay. Between brackets is shown the total number of HI positive samples.

<sup>b</sup> Number of positive serum samples tested using the MN assay.
